# Supplementary material for: Trilaminar ZnO/ZnS/Sb2S3 nanotube arrays for efficient inorganic–organic hybrid solar cells
Source: Royal Society of Chemistry journal article supplement (doi:10.1039/c4ra02554g), 2014-01-01
Supplement: c4ra02554g1.pdf [file c4ra02554g1.pdf]

Supplemental information:

Fig.1 XRD patterns of the ZnO/Sb<sub>2</sub>S<sub>3</sub> (a) and ZnO/ZnS/Sb<sub>2</sub>S<sub>3</sub> (b)

Fig.2 J–V curve of the ZnO/Sb<sub>2</sub>S<sub>3</sub> core/shell NTs inorganic-organic hybrid solar cells under simulated AM 1.5 sunlight (100 mW/cm<sup>2</sup>)

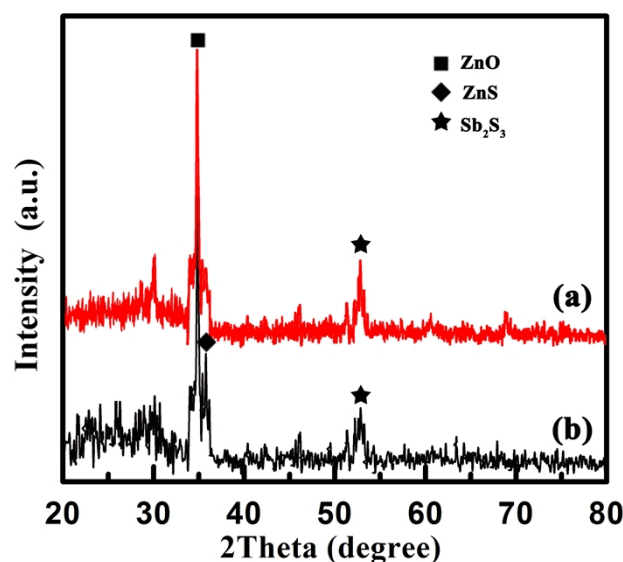

Fig.1 XRD patterns of the ZnO/Sb<sub>2</sub>S<sub>3</sub> (a) and ZnO/ZnS/Sb<sub>2</sub>S<sub>3</sub> (b)

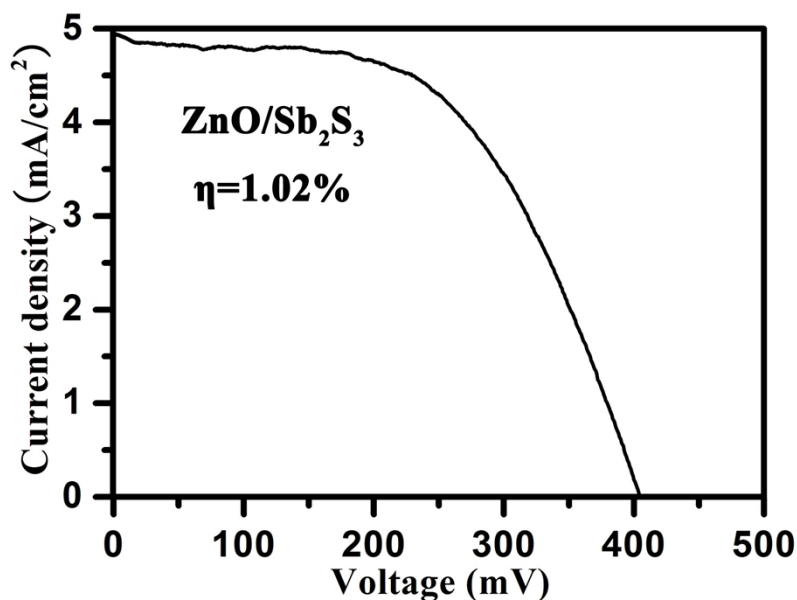

Fig.2 J–V curve of the ZnO/Sb<sub>2</sub>S<sub>3</sub> core/shell NTs inorganic-organic hybrid solar cells under simulated AM 1.5 sunlight (100 mW/cm<sup>2</sup>)
